# Supplementary material for: Comparative analysis of stability and biological activities of violacein and starch capped silver nanoparticles
Source: Royal Society of Chemistry journal article supplement (doi:10.1039/c6ra25806a), 2017-01-01
Supplement: c6ra25806a1.pdf [file c6ra25806a1.pdf]

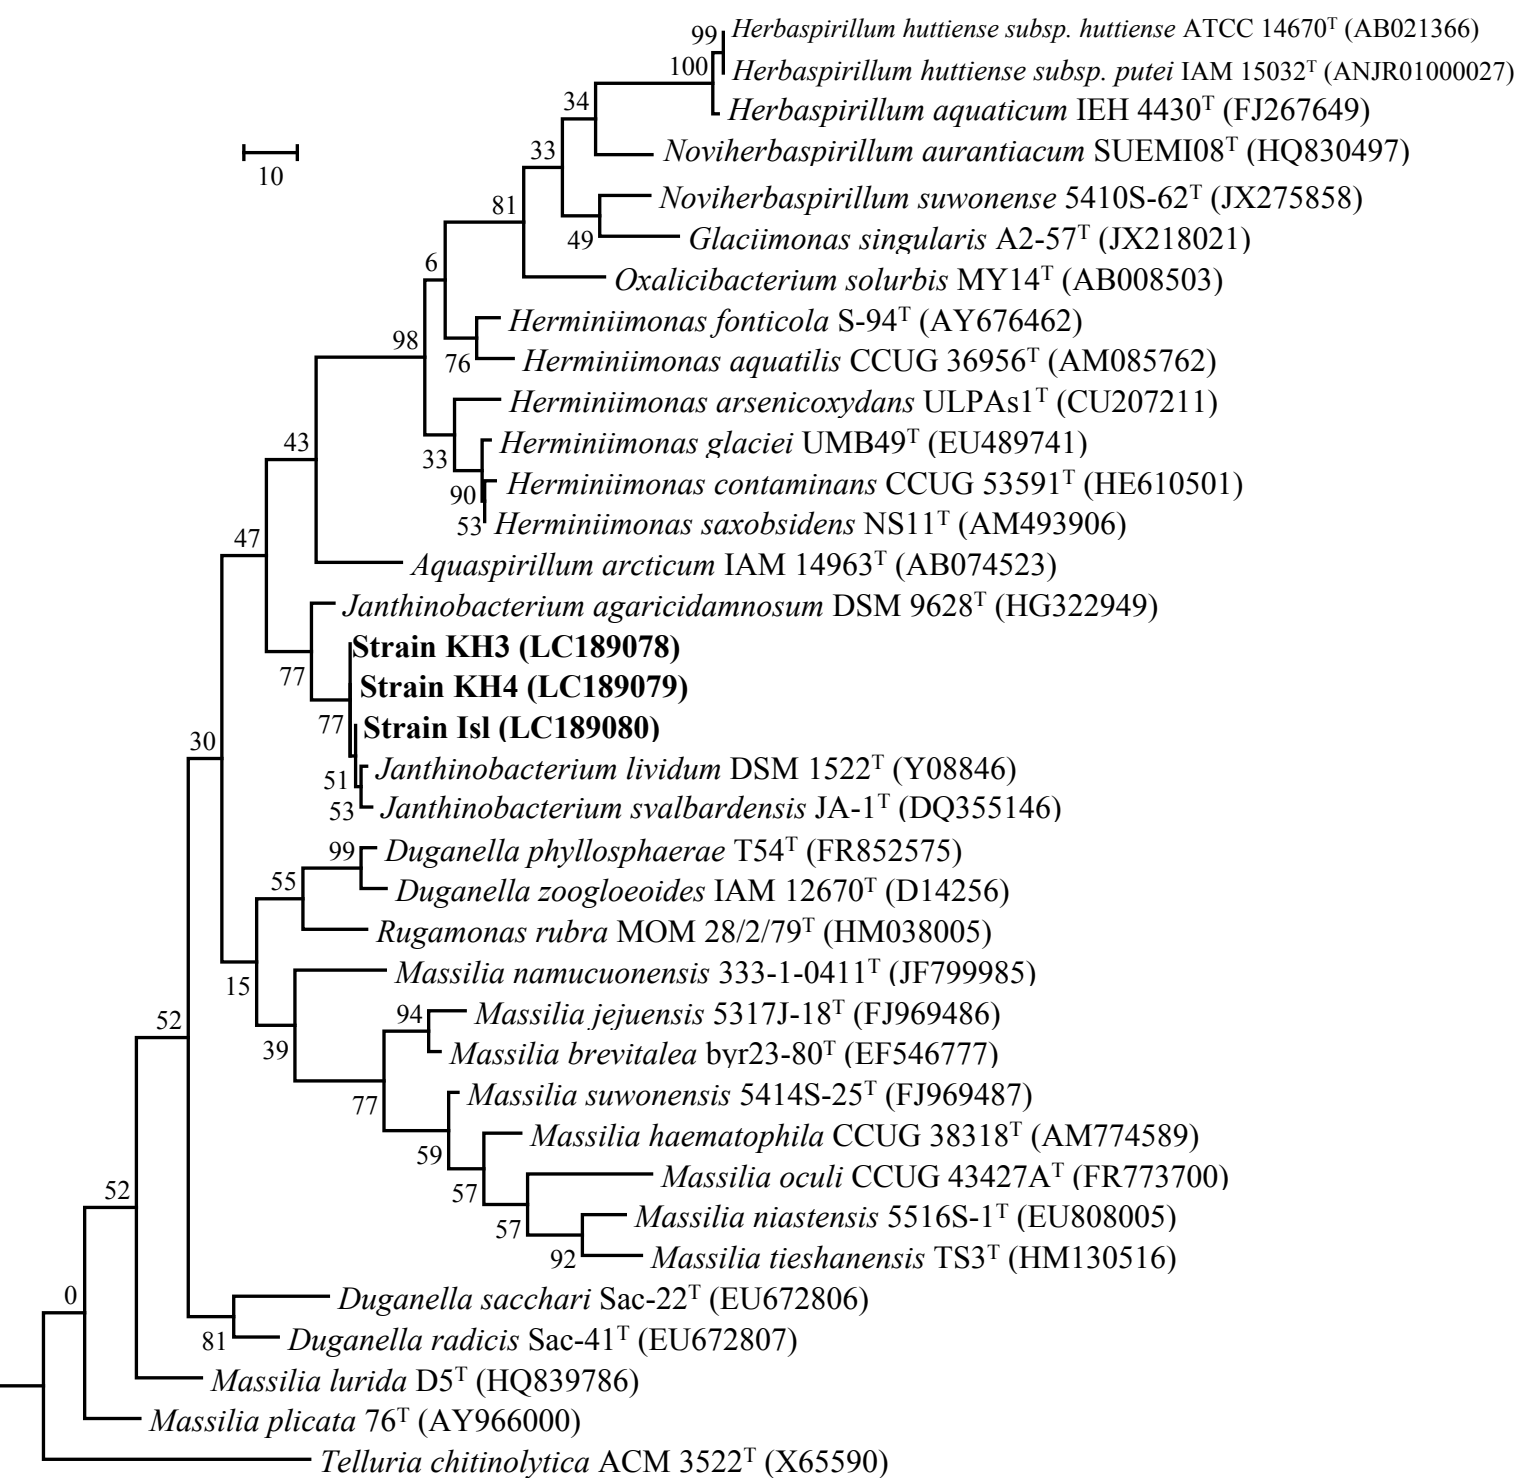

**Figure S1:** Maximum parsimony phylogenetic tree constructed based on 16S rRNA gene sequence of isolated strains with the closely related validly published species. The tree was rooted by using *Telluria chitinolytica* ACM 3522<sup>T</sup> (X65590) as an out-group. Bootstrap values (only > 60 % are shown) are given at the branching points. Bar indicates 1.0 % sequence divergence.

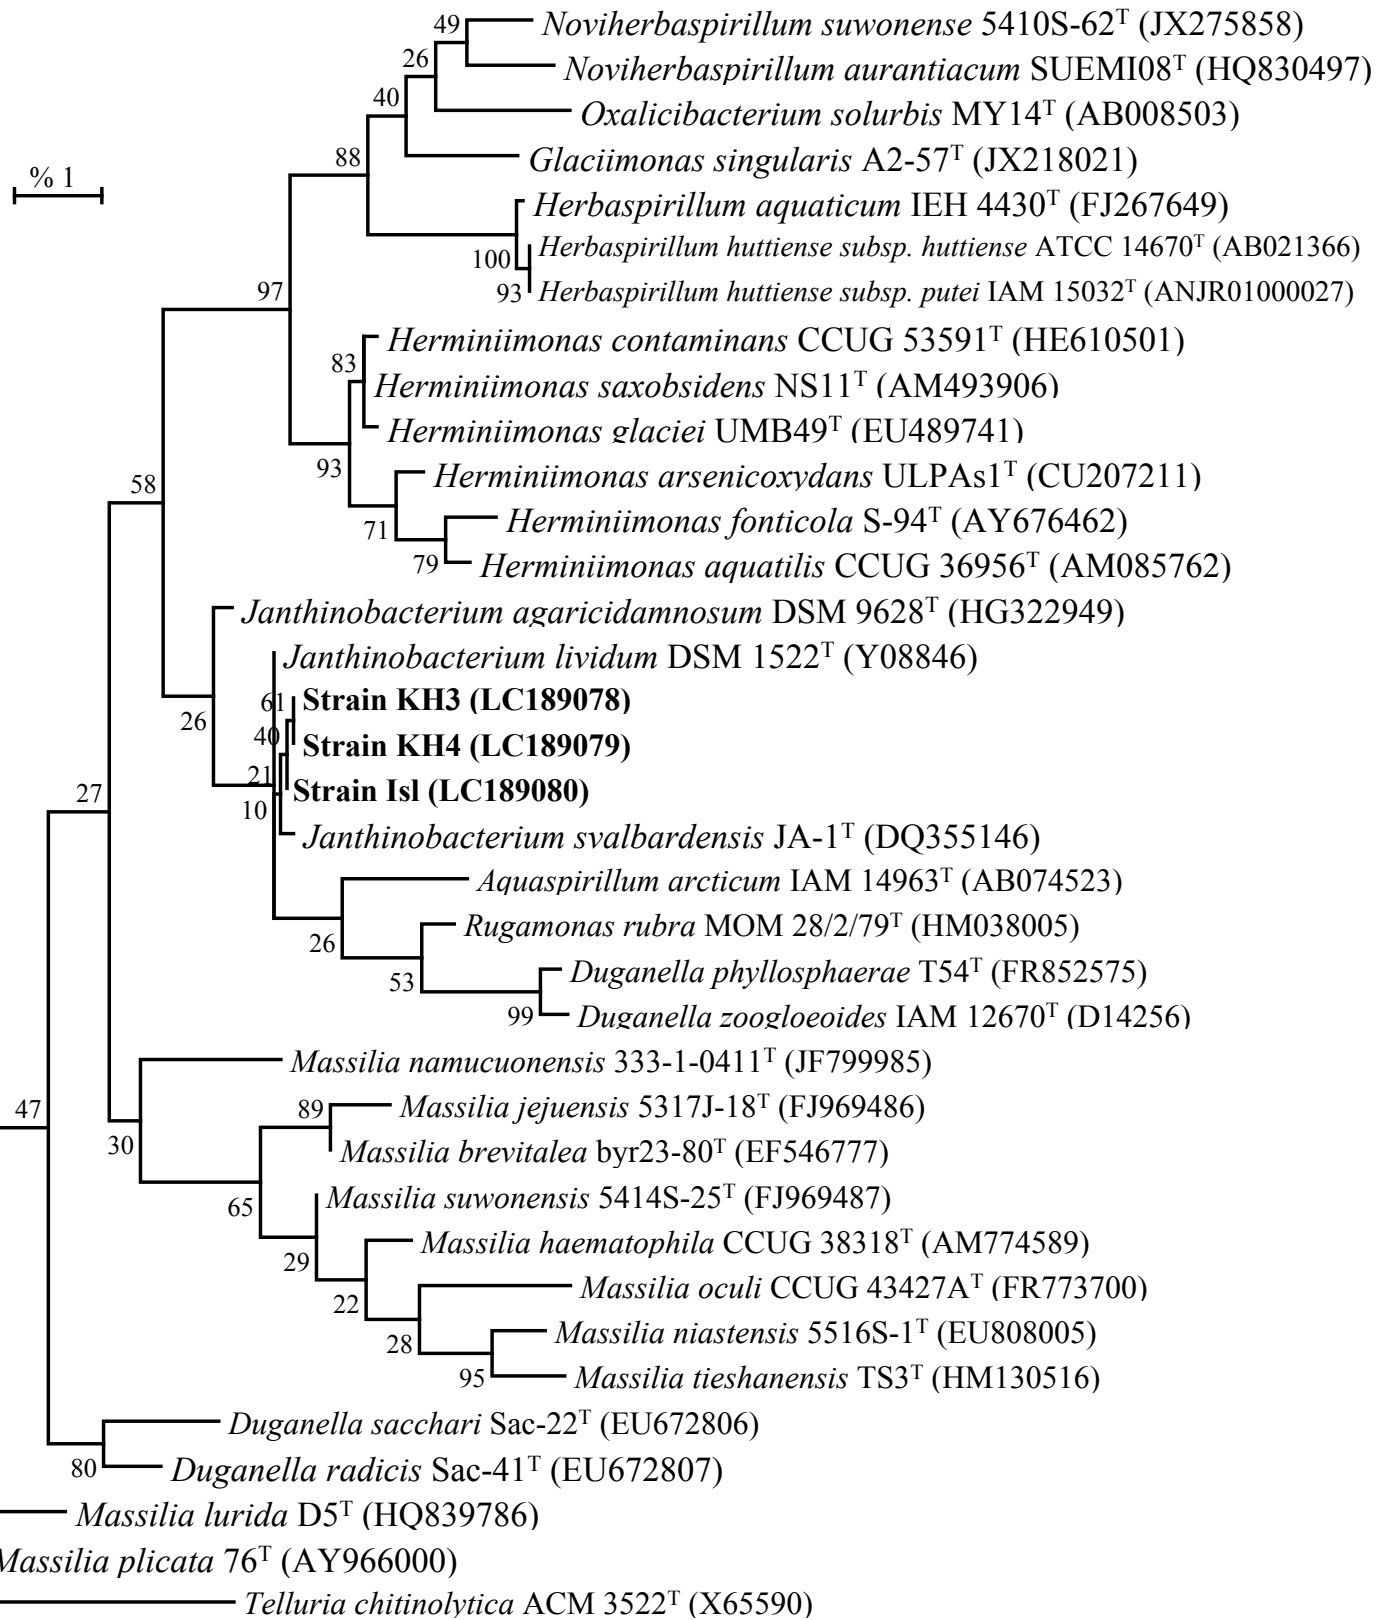

**Figure S2:** Maximum likelihood phylogenetic tree constructed based on 16S rRNA gene sequence of isolated strains with the closely related validly published species. The tree was rooted by using *Telluria chitinolytica* ACM 3522<sup>T</sup> (X65590) as

an out-group. Bootstrap values (only > 60 % are shown) are given at the branching points. Bar indicates 1.0 % sequence divergence.

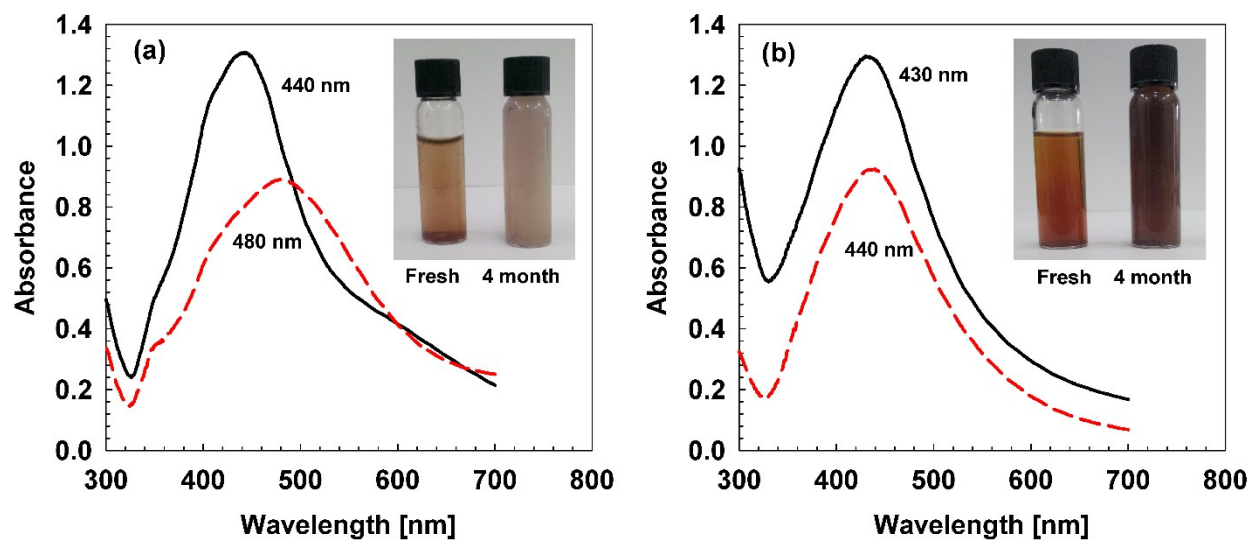

**Figure S3:** UV-Vis spectra indicating aging of AgNPs. (a) cAgNPs and (b) vAgNPs. (—) denote freshly prepared samples and (---) denote storage time of 4 months.

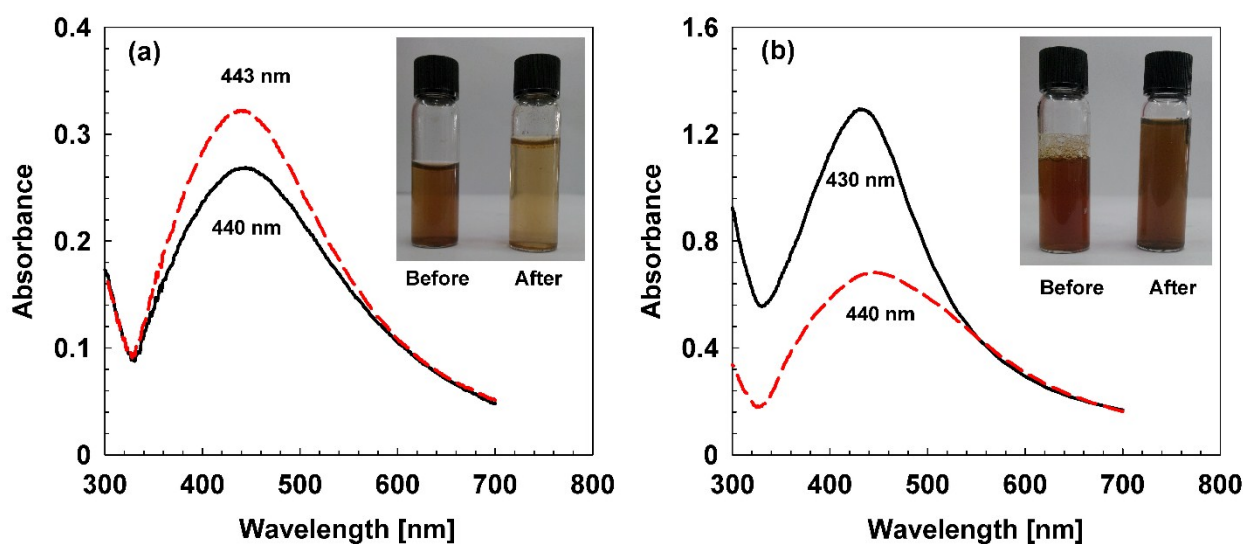

**Figure S4:** UV-Vis Spectra indicating effect of temperature on AgNPs. (a) cAgNPs (b) vAgNPs. (—) denote absorbance before heating and (---) denote absorbance after heating at 60°C.

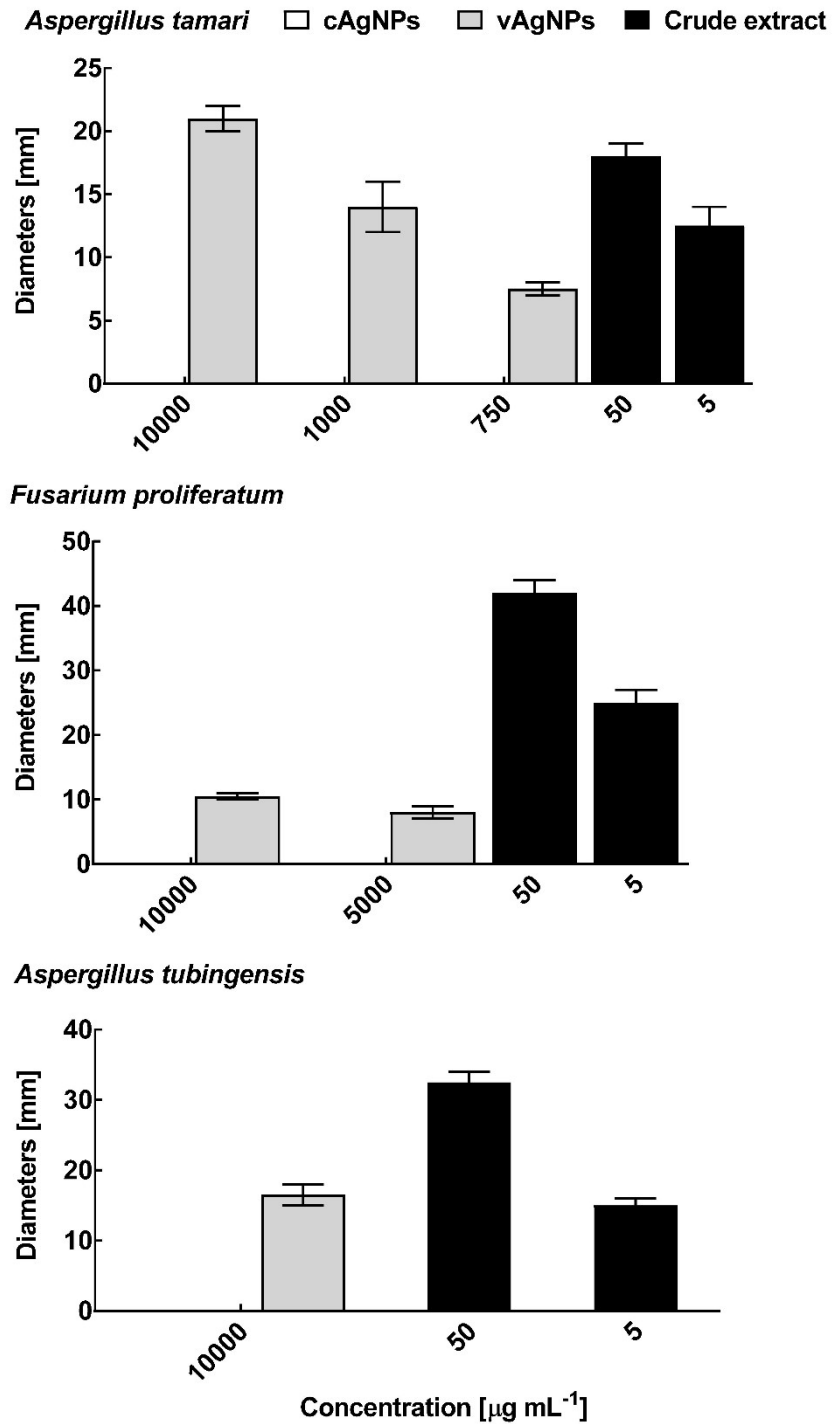

**Figure S5:** Antifungal activity of AgNPs and crude violacein. The error bars represent the standard error of mean. Greater the error bars, greater is the deviation between repetitive values.

**Table S1: Crystalline Size Measurement for the AgNPs. (a) cAgNPs and (b) vAgNPs**

**(a)**

| <b>Phases<br/>cAgNPs</b> | <b>Peak position<br/>(°2<math>\theta</math>)</b> | <b><math>\beta</math><br/>Observed</b> | <b><math>\beta</math><br/>Standard</b> | <b><math>\beta</math><br/>Structural</b> | <b>Size<br/>(Å)</b> | <b>Size<br/>(nm)</b> |
|--------------------------|--------------------------------------------------|----------------------------------------|----------------------------------------|------------------------------------------|---------------------|----------------------|
| <b>111</b>               | 32.24                                            | 0.197                                  | 0.008                                  | 0.19                                     | <b>437.55</b>       | <b>43.75</b>         |
| <b>200</b>               | 43.91                                            | 0.134                                  | 0.008                                  | 0.13                                     | <b>679.82</b>       | <b>67.98</b>         |
| <b>220</b>               | 64.33                                            | 0.472                                  | 0.008                                  | 0.46                                     | <b>202.26</b>       | <b>20.23</b>         |

Average=44.01

**(b)**

| <b>Phases<br/>vAgNPs</b> | <b>Peak position<br/>(°2<math>\theta</math>)</b> | <b><math>\beta</math><br/>Observed</b> | <b><math>\beta</math><br/>Standard</b> | <b><math>\beta</math><br/>Structural</b> | <b>Size<br/>(Å)</b> | <b>Size<br/>(nm)</b> |
|--------------------------|--------------------------------------------------|----------------------------------------|----------------------------------------|------------------------------------------|---------------------|----------------------|
| <b>111</b>               | 32.2                                             | 0.276                                  | 0.008                                  | 0.19                                     | <b>309.01</b>       | <b>30.90</b>         |
| <b>200</b>               | 44.04                                            | 0.203                                  | 0.008                                  | 0.13                                     | <b>439.47</b>       | <b>43.95</b>         |
| <b>220</b>               | 64.40                                            | 0.63                                   | 0.008                                  | 0.46                                     | <b>150.94</b>       | <b>15.09</b>         |

Average=29.98
